# Supplementary material for: Effect of Stereochemical Configuration on the Transport and Metabolism of Catechins from Green Tea across Caco-2 Monolayers
Source: MDPI journal article supplement (doi:10.3390/molecules24061185), 2019-03-26
Supplement: s1 [file s1]

**Figure S1. The viability of Caco-2 cell with different concentrations of GTCs: (A) C and EC; (B) GC and EGC; (C) CG and ECG; (D) GCG and EGCG**

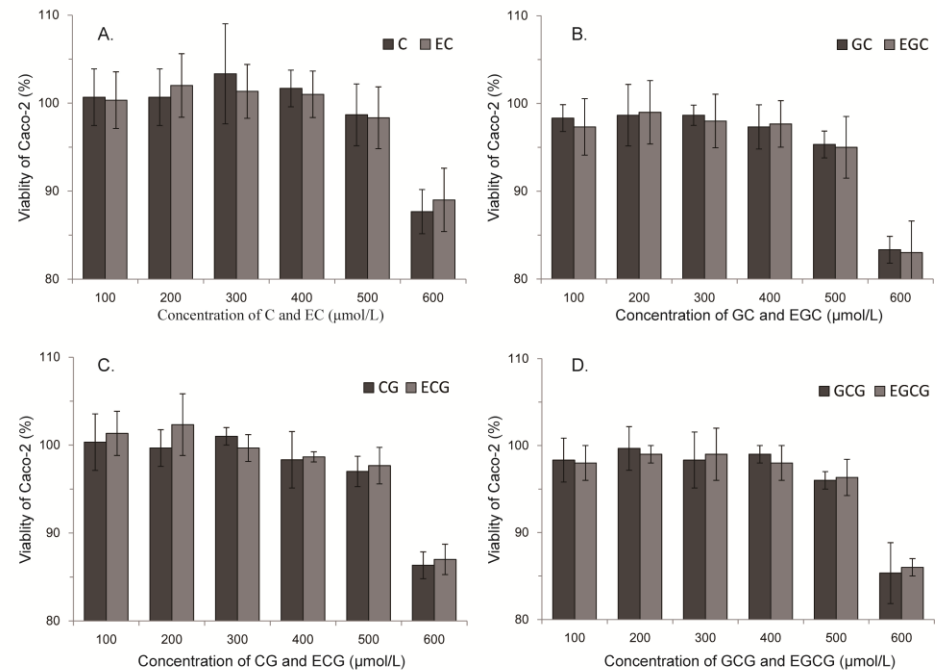

**Figure S2: MS/MS (negative ion) spectra of C metabolites**

The MS/MS spectra were corresponding to (A)  $m/z$  369  $[M-H]^-$  and (B) 303  $[M-H]^-$  in the samples taken from apical sides after loading C in basolateral side

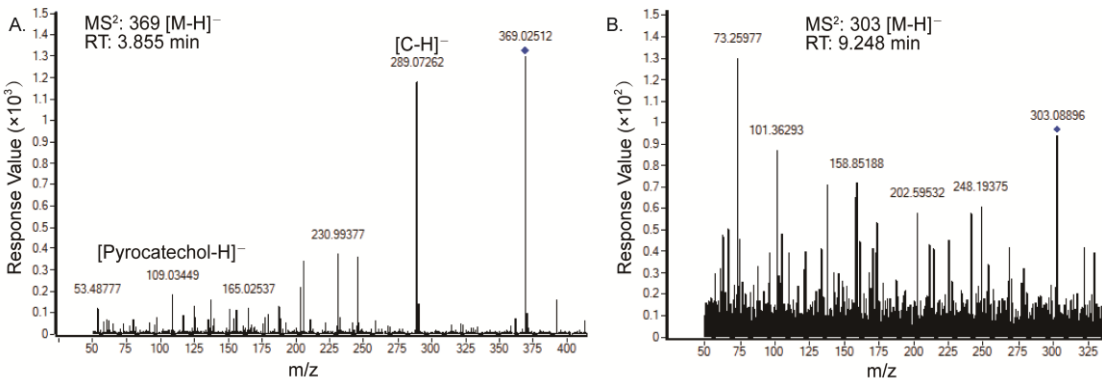

### Figure S3: MS/MS (negative ion) spectra of CG metabolites

The MS/MS spectra were corresponding to (A)  $m/z$  521  $[M-H]^-$ , (B)  $m/z$  455  $[M-H]^-$ , (C)  $m/z$  535  $[M-H]^-$  (15.694 min) and (D)  $m/z$  535  $[M-H]^-$  (17.110 min) in the samples taken from apical sides after loading CG in basolateral side

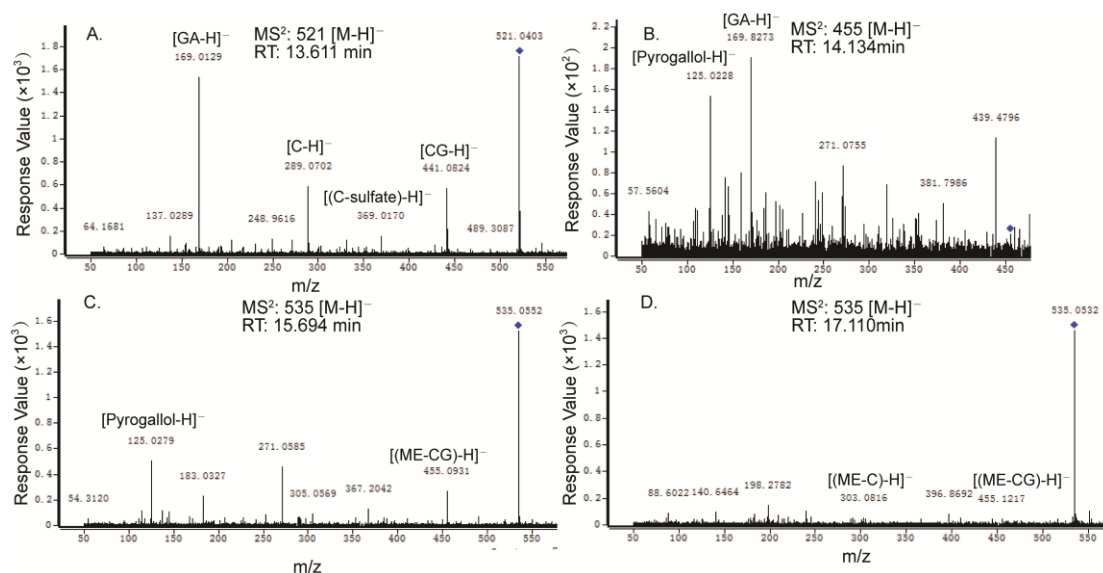

### Figure S4: MS/MS (negative ion) spectra of GC metabolites

The MS/MS spectra were corresponding to (A)  $m/z$  385  $[M-H]^-$  and (B)  $m/z$  399  $[M-H]^-$  in the samples taken from apical sides after loading GC in basolateral side

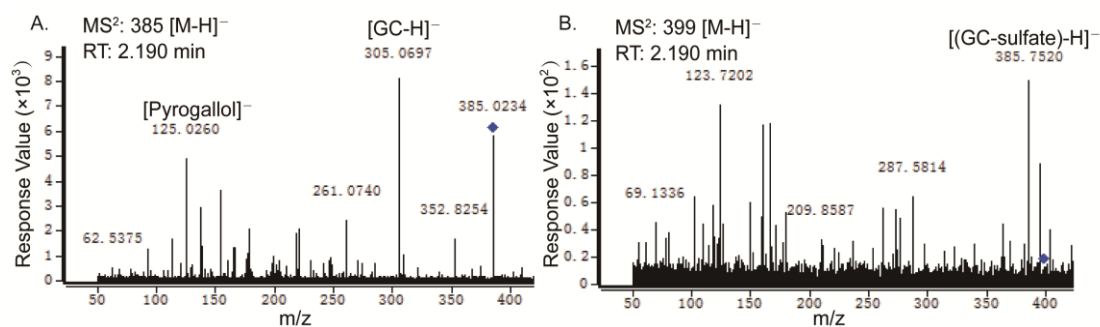

### Figure S5: MS/MS (negative ion) spectra of GCG metabolites

The MS/MS spectra were corresponding to (A) m/z 537 [M-H]<sup>-</sup>, (B) m/z 471[M-H]<sup>-</sup> and (C) m/z 551[M-H]<sup>-</sup> in the samples taken from apical sides after loading GCG in basolateral side

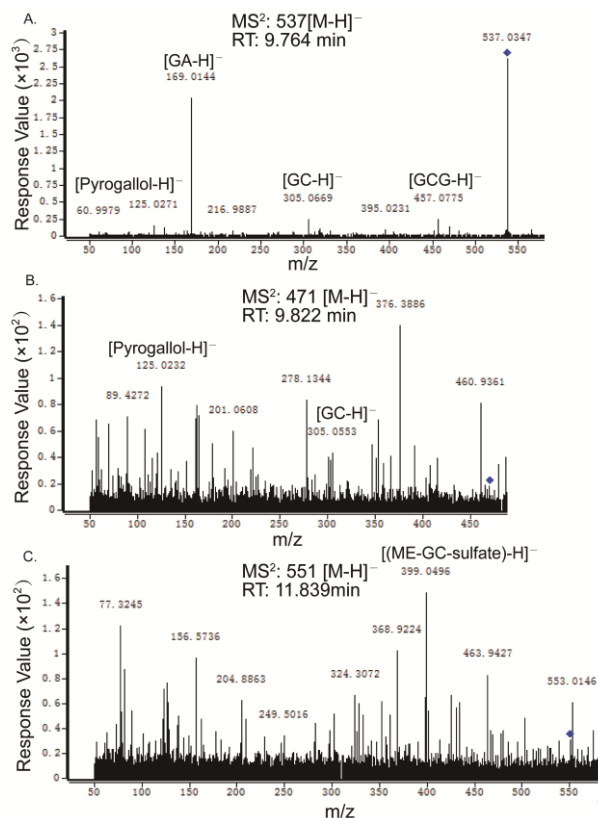

**Table S1. Standard curves of GTCs**

| Catechins | Regression equation  | Correlation coefficient | Linear range (μg/mL) |
|-----------|----------------------|-------------------------|----------------------|
| C         | y=4.6655x + 0.1765   | 0.9997                  | 1.0-100.0            |
| EC        | y=4.6512x + 5.0886   | 0.9990                  | 2.0-100.0            |
| CG        | y=15.966x + 5.5271   | 0.9990                  | 1.0-100.0            |
| ECG       | y=11.121x-8.4906     | 0.9998                  | 0.5-100.0            |
| GC        | y = 1.3481x - 2.5387 | 0.9996                  | 0.2-100.0            |
| EGC       | y=6.343x - 25.293    | 0.9995                  | 2.0-100.0            |
| GCG       | y=8.8984x - 9.9642   | 0.9998                  | 1.0-100.0            |
| EGCG      | y=8.2688x - 13.049   | 0.9997                  | 2.0-100.0            |
